# Supplementary material for: Investigation of Pyrolysis Kinetic Triplet, Thermodynamics, Product Characteristics and Reaction Mechanism of Waste Cooking Oil Biodiesel under the Influence of Copper Slag
Source: MDPI journal article supplement (doi:10.3390/en16052137), 2023-02-22
Supplement: s1 [file s1]

# Investigation of Pyrolysis Kinetic Triplet, Thermodynamics, Product Characteristics and Reaction Mechanism of Waste Cooking Oil Biodiesel under the Influence of Copper Slag

Tianhao Shen <sup>1</sup>, Fengxia Zhang <sup>1,2</sup>, Shiliang Yang <sup>1</sup>, Hua Wang <sup>1,3</sup> and Jianhang Hu <sup>1,\*</sup>

<sup>1</sup> Engineering Research of Metallurgy Energy Conservation & Emission Reduction, Ministry of Education, Kunming University of Science and Technology, Kunming 650093, China

<sup>2</sup> Kunming Institute of Metallurgy, College of Metallurgy and Mining, Kunming 650033, China

<sup>3</sup> State Key Laboratory of Complex Nonferrous Metal Resources Clean Utilization, Kunming University of Science and Technology, Kunming 650093, China

\* Correspondence: jianhang@kust.edu.cn

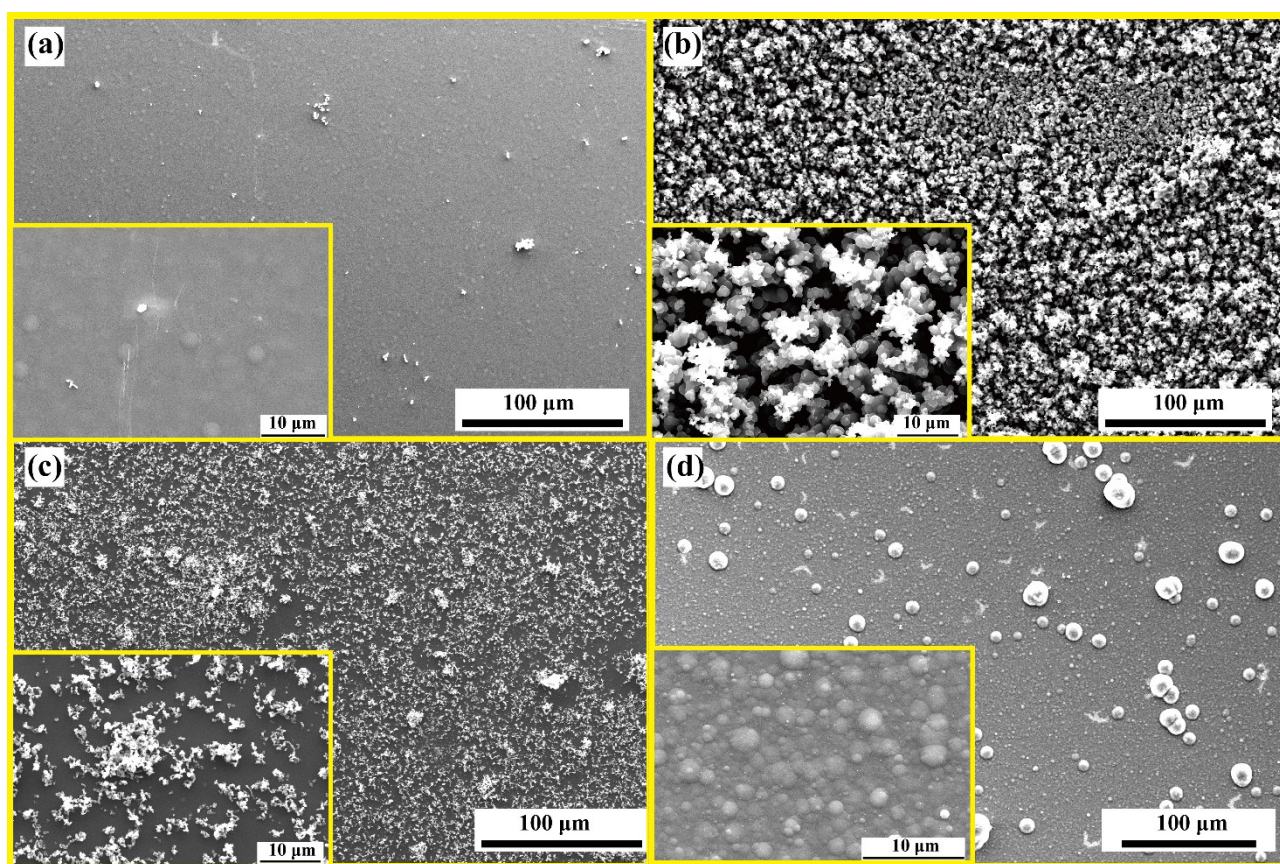

**Figure S1.** SEM images of QTW-Coke and QCS-Coke at 900 °C: (a, b) no CS; (c, d) with CS.

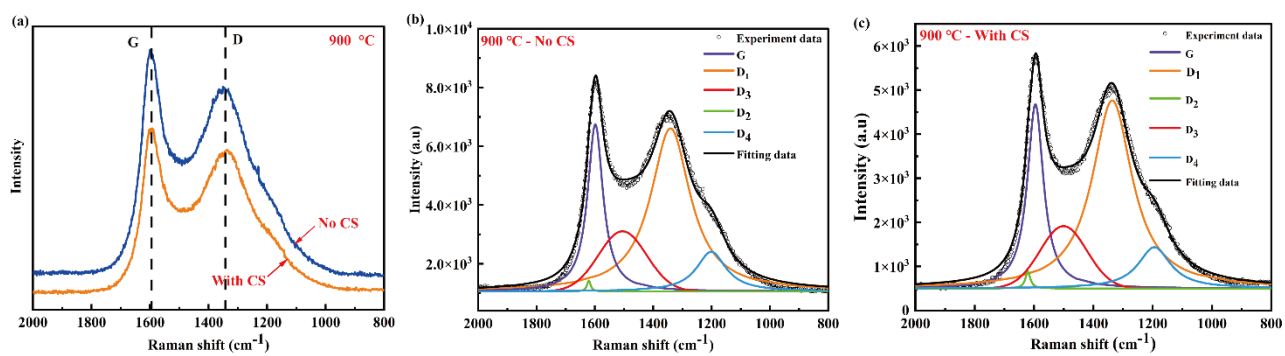

**Figure S2.** Raman spectra and fitted bands of coke at 900 °C.

**Table S1.** Compounds of pure WCO-Biodiesel liquid products at different pyrolysis temperatures analyzed by GC-MS.

| No.                               | Name of compound                                                | Molecular formula                              | Relative concentration (peak area %) |             |        |        |
|-----------------------------------|-----------------------------------------------------------------|------------------------------------------------|--------------------------------------|-------------|--------|--------|
|                                   |                                                                 |                                                | 600 °C                               | 700 °C      | 800 °C | 900 °C |
| <b>Oxygenated compounds (OCs)</b> |                                                                 |                                                | <b>39.28</b>                         | <b>9.69</b> | -      | -      |
| 1                                 | Acetic acid, methyl ester                                       | C <sub>3</sub> H <sub>6</sub> O <sub>2</sub>   | 0.57                                 | -           | -      | -      |
| 2                                 | 2-Propenoic acid, methyl ester                                  | C <sub>4</sub> H <sub>6</sub> O <sub>2</sub>   | 2.14                                 | 0.13        | -      | -      |
| 3                                 | 4-Nonenoic acid, methyl ester                                   | C <sub>10</sub> H <sub>18</sub> O <sub>2</sub> | 0.56                                 | -           | -      | -      |
| 4                                 | Methyl 3-butenolate                                             | C <sub>5</sub> H <sub>8</sub> O <sub>2</sub>   | 1.68                                 | -           | -      | -      |
| 5                                 | 2-Butenoic acid, methyl ester, (E)-                             | C <sub>5</sub> H <sub>8</sub> O <sub>2</sub>   | 0.28                                 | -           | -      | -      |
| 6                                 | 4-Pentenoic acid, methyl ester                                  | C <sub>6</sub> H <sub>10</sub> O <sub>2</sub>  | 1.03                                 | -           | -      | -      |
| 7                                 | Camphenol, 6-                                                   | C <sub>10</sub> H <sub>16</sub> O              | 0.10                                 | -           | -      | -      |
| 8                                 | Cyclohexanemethanol, 4-methylene-                               | C <sub>8</sub> H <sub>14</sub> O               | 0.14                                 | -           | -      | -      |
| 9                                 | 1,2-Dioxaspiro[4.5]decan-3-one, 4-methylene-                    | C <sub>9</sub> H <sub>12</sub> O <sub>3</sub>  | 0.17                                 | -           | -      | -      |
| 10                                | 5-Hexenoic acid, methyl ester                                   | C <sub>7</sub> H <sub>12</sub> O <sub>2</sub>  | 0.72                                 | -           | -      | -      |
| 11                                | Methyl trans-2-(3-cyclopropyl-7-norcaranyl)acetate              | C <sub>13</sub> H <sub>20</sub> O <sub>2</sub> | 0.10                                 | -           | -      | -      |
| 12                                | 6-Heptenoic acid, methyl ester                                  | C <sub>8</sub> H <sub>14</sub> O <sub>2</sub>  | 3.01                                 | -           | -      | -      |
| 13                                | Carveol                                                         | C <sub>10</sub> H <sub>16</sub> O              | 0.18                                 | -           | -      | -      |
| 14                                | 6-Heptynoic acid, methyl ester                                  | C <sub>8</sub> H <sub>12</sub> O <sub>2</sub>  | 0.53                                 | -           | -      | -      |
| 15                                | 3-Octenoic acid, methyl ester, (Z)-                             | C <sub>9</sub> H <sub>16</sub> O <sub>2</sub>  | 1.11                                 | -           | -      | -      |
| 16                                | 4,7-Methano-1H-inden-1-ol, 3a,4,7,7a-tetrahydro-, acetate       | C <sub>12</sub> H <sub>14</sub> O <sub>2</sub> | 0.21                                 | -           | -      | -      |
| 17                                | Bicyclo[2.2.1]hept-5-ene-2-carboxylic acid, methyl ester, endo- | C <sub>9</sub> H <sub>12</sub> O <sub>2</sub>  | 0.58                                 | -           | -      | -      |
| 18                                | Methyl 5-norbornene-2-carboxylate                               | C <sub>9</sub> H <sub>12</sub> O <sub>2</sub>  | 1.57                                 | -           | -      | -      |
| 19                                | 8-Nonenoic acid, methyl ester                                   | C <sub>10</sub> H <sub>18</sub> O <sub>2</sub> | 1.49                                 | -           | -      | -      |
| 20                                | 4a,8a-Epoxy-naphthalene, 1,4,5,8-tetrahydro-                    | C <sub>10</sub> H <sub>12</sub> O              | 0.41                                 | -           | -      | -      |
| 21                                | 6-Propenylbicyclo[3.1.0]hexan-2-one                             | C <sub>9</sub> H <sub>12</sub> O               | 0.31                                 | -           | -      | -      |
| 22                                | 4-Decenoic acid, methyl ester                                   | C <sub>11</sub> H <sub>20</sub> O <sub>2</sub> | 1.09                                 | -           | -      | -      |
| 23                                | 9,12-Octadecadiynoic acid, methyl ester                         | C <sub>19</sub> H <sub>30</sub> O <sub>2</sub> | 0.11                                 | 2.02        | -      | -      |
| 24                                | 10-Undecenoic acid, methyl ester                                | C <sub>12</sub> H <sub>22</sub> O <sub>2</sub> | 0.72                                 | -           | -      | -      |
| 25                                | 5,8,11-Heptadecatriynoic acid, methyl                           | C <sub>18</sub> H <sub>24</sub> O <sub>2</sub> | 0.18                                 | -           | -      | -      |
| 26                                | Cyclopropanenonanoic acid, methyl                               | C <sub>13</sub> H <sub>24</sub> O <sub>2</sub> | 0.56                                 | -           | -      | -      |
| 27                                | Cyclopropanenonanoic acid, methyl ester                         | C <sub>13</sub> H <sub>24</sub> O <sub>2</sub> | 0.46                                 | -           | -      | -      |
| 28                                | Methyl tetradecanoate                                           | C <sub>15</sub> H <sub>30</sub> O <sub>2</sub> | 0.28                                 | -           | -      | -      |
| 29                                | Methyl myristoleate                                             | C <sub>15</sub> H <sub>28</sub> O <sub>2</sub> | 0.50                                 | -           | -      | -      |
| 30                                | 9-Octadecenoic acid (Z)-, methyl ester                          | C <sub>19</sub> H <sub>36</sub> O <sub>2</sub> | 0.31                                 | -           | -      | -      |
| 31                                | Hexadecanoic acid, methyl ester                                 | C <sub>17</sub> H <sub>34</sub> O <sub>2</sub> | 12.58                                | 1.69        | -      | -      |
| 32                                | 11-Hexadecenoic acid, methyl ester                              | C <sub>17</sub> H <sub>32</sub> O <sub>2</sub> | 0.23                                 | -           | -      | -      |
| 33                                | 8-Phenyl octanoic acid                                          | C <sub>14</sub> H <sub>20</sub> O <sub>2</sub> | 0.23                                 | -           | -      | -      |
| 34                                | Methyl stearate                                                 | C <sub>19</sub> H <sub>38</sub> O <sub>2</sub> | 4.53                                 | -           | -      | -      |
| 35                                | 9,12-Octadecadienoic acid (Z,Z)-, methyl ester                  | C <sub>19</sub> H <sub>34</sub> O <sub>2</sub> | 0.50                                 | 5.74        | -      | -      |
| 36                                | 14,17-Octadecadienoic acid, methyl ester                        | C <sub>19</sub> H <sub>34</sub> O <sub>2</sub> | 0.10                                 | -           | -      | -      |
| 37                                | 9,12,15-Octadecatrienoic acid, methyl ester, (Z,Z,Z)-           | C <sub>19</sub> H <sub>32</sub> O <sub>2</sub> | -                                    | 0.11        | -      | -      |
| <b>Alkenes</b>                    |                                                                 |                                                | <b>15.22</b>                         | <b>0.43</b> | -      | -      |
| 38                                | 1-Pentene                                                       | C <sub>5</sub> H <sub>10</sub>                 | 0.48                                 | -           | -      | -      |
| 39                                | Cyclobutene, 3,3-dimethyl-                                      | C <sub>6</sub> H <sub>10</sub>                 | 0.30                                 | -           | -      | -      |
| 40                                | 1-Heptene                                                       | C <sub>7</sub> H <sub>14</sub>                 | 2.09                                 | -           | -      | -      |
| 41                                | Cyclohexene                                                     | C <sub>6</sub> H <sub>10</sub>                 | 0.73                                 | -           | -      | -      |
| 42                                | 1,3-Cyclopentadiene, 1-methyl-                                  | C <sub>6</sub> H <sub>8</sub>                  | 0.79                                 | -           | -      | -      |
| 43                                | Cyclohexene, 4-methyl-                                          | C <sub>7</sub> H <sub>12</sub>                 | 0.42                                 | -           | -      | -      |
| 44                                | 1-Octene                                                        | C <sub>8</sub> H <sub>16</sub>                 | 1.34                                 | -           | -      | -      |
| 45                                | 1,3-Cyclopentadiene, 5,5-dimethyl-                              | C <sub>7</sub> H <sub>10</sub>                 | 0.29                                 | -           | -      | -      |
| 46                                | 1,4-Cyclohexadiene, 1-methyl-                                   | C <sub>7</sub> H <sub>10</sub>                 | 0.36                                 | -           | -      | -      |

|                                                |                                                              |                                 |              |              |              |             |
|------------------------------------------------|--------------------------------------------------------------|---------------------------------|--------------|--------------|--------------|-------------|
| 47                                             | 4-Methyl-1,4-heptadiene                                      | C <sub>8</sub> H <sub>14</sub>  | 0.16         | -            | -            | -           |
| 48                                             | 1,3-Cycloheptadiene                                          | C <sub>7</sub> H <sub>10</sub>  | 0.23         | -            | -            | -           |
| 49                                             | 3-Methylenecyclohexene                                       | C <sub>7</sub> H <sub>10</sub>  | 0.13         | -            | -            | -           |
| 50                                             | 1-Nonene                                                     | C <sub>9</sub> H <sub>18</sub>  | 0.98         | -            | -            | -           |
| 51                                             | 1,8-Nonadiene                                                | C <sub>9</sub> H <sub>16</sub>  | 0.36         | -            | -            | -           |
| 52                                             | 1-Decene                                                     | C <sub>10</sub> H <sub>20</sub> | 0.80         | -            | -            | -           |
| 53                                             | 1-Undecene                                                   | C <sub>11</sub> H <sub>22</sub> | 0.89         | -            | -            | -           |
| 54                                             | 1-Dodecene                                                   | C <sub>12</sub> H <sub>24</sub> | 0.67         | -            | -            | -           |
| 55                                             | 1,2-Bis(3-cyclohexenyl)ethylene                              | C <sub>14</sub> H <sub>20</sub> | 0.28         | -            | -            | -           |
| 52                                             | Bicyclo[3.2.0]hept-2-ene, 2-methyl-                          | C <sub>8</sub> H <sub>12</sub>  | 1.02         | -            | -            | -           |
| 53                                             | 1-Tridecene                                                  | C <sub>13</sub> H <sub>26</sub> | 0.55         | 0.24         | -            | -           |
| 54                                             | Bicyclo[3.2.0]hept-2-ene, 2-methyl-                          | C <sub>8</sub> H <sub>12</sub>  | 1.20         | 0.08         | -            | -           |
| 55                                             | Bicyclo[6.4.0]dodeca-9,11-diene                              | C <sub>12</sub> H <sub>18</sub> | 0.17         | 0.27         | -            | -           |
| 56                                             | Bicyclo[2.2.1]hept-2-ene, 2,3-dimethyl-                      | C <sub>9</sub> H <sub>14</sub>  | 0.31         | -            | -            | -           |
| 57                                             | Cyclohexene, 5,6-diethenyl-1-methyl-                         | C <sub>11</sub> H <sub>16</sub> | 0.54         | -            | -            | -           |
| 58                                             | Cetene                                                       | C <sub>16</sub> H <sub>32</sub> | 0.15         | -            | -            | -           |
| 59                                             | 1,3,5-Heptatriene, (E,E)-                                    | C <sub>7</sub> H <sub>10</sub>  | -            | 0.07         | -            | -           |
| 60                                             | Cyclobuta[1,2:3,4]dicyclopentene, 1,3a,3b,6,6a,6b-hexahydro- | C <sub>10</sub> H <sub>12</sub> | -            | 0.09         | -            | -           |
| 61                                             | Azulene                                                      | C <sub>10</sub> H <sub>8</sub>  | -            | 0.26         | -            | -           |
| <b>Alkanes</b>                                 |                                                              |                                 | <b>2.71</b>  | <b>0.10</b>  | -            | -           |
| 61                                             | Cyclopropane, 1-ethyl-2-methyl-, cis-                        | C <sub>6</sub> H <sub>12</sub>  | 2.09         | -            | -            | -           |
| 62                                             | Cyclopentane, methylene-                                     | C <sub>6</sub> H <sub>10</sub>  | 0.62         | -            | -            | -           |
| 63                                             | Ethylidenecyclobutane                                        | C <sub>6</sub> H <sub>10</sub>  | -            | 0.10         | -            | -           |
| <b>Monocyclic aromatic hydrocarbons (MAHs)</b> |                                                              |                                 | <b>35.43</b> | <b>51.13</b> | <b>33.98</b> | <b>7.99</b> |
| 64                                             | Benzene                                                      | C <sub>6</sub> H <sub>6</sub>   | 7.19         | 10.08        | 3.09         | 3.21        |
| 65                                             | Toluene                                                      | C <sub>7</sub> H <sub>8</sub>   | 8.50         | 11.30        | 3.12         | -           |
| 66                                             | Ethylbenzene                                                 | C <sub>8</sub> H <sub>10</sub>  | 2.03         | 1.21         | 0.42         | -           |
| 67                                             | Benzene, 1,3-dimethyl-                                       | C <sub>8</sub> H <sub>10</sub>  | 2.08         | 4.20         | -            | -           |
| 68                                             | o-Xylene                                                     | C <sub>8</sub> H <sub>10</sub>  | 1.38         | -            | -            | -           |
| 69                                             | Styrene                                                      | C <sub>8</sub> H <sub>8</sub>   | 2.61         | 8.14         | 11.93        | -           |
| 70                                             | Benzene, propyl-                                             | C <sub>9</sub> H <sub>12</sub>  | 0.77         | 0.1          | -            | -           |
| 71                                             | Benzene, 1-ethyl-4-methyl-                                   | C <sub>9</sub> H <sub>12</sub>  | 1.42         | 0.06         | -            | -           |
| 72                                             | Benzene, 1-ethyl-3-methyl-                                   | C <sub>9</sub> H <sub>12</sub>  | 0.57         | 0.49         | -            | -           |
| 74                                             | Mesitylene                                                   | C <sub>9</sub> H <sub>12</sub>  | 0.57         | 0.17         | -            | -           |
| 75                                             | Methylstyrene                                                | C <sub>9</sub> H <sub>10</sub>  | 0.31         | 0.28         | -            | -           |
| 76                                             | Benzene, 1-ethenyl-2-methyl-                                 | C <sub>9</sub> H <sub>10</sub>  | 0.77         | -            | 0.85         | -           |
| 77                                             | Benzene, butyl-                                              | C <sub>10</sub> H <sub>14</sub> | 0.54         | -            | -            | -           |
| 78                                             | Benzene, 1-propenyl-                                         | C <sub>9</sub> H <sub>10</sub>  | 0.67         | -            | -            | 0.27        |
| 79                                             | Indane                                                       | C <sub>9</sub> H <sub>10</sub>  | 0.63         | 0.52         | -            | -           |
| 80                                             | Indene                                                       | C <sub>9</sub> H <sub>8</sub>   | 1.95         | 4.60         | 6.44         | -           |
| 81                                             | Benzene, pentyl-                                             | C <sub>11</sub> H <sub>16</sub> | 0.39         | -            | -            | -           |
| 82                                             | Benzene, 1-methyl-2-(2-propenyl)-                            | C <sub>10</sub> H <sub>12</sub> | 0.40         | -            | -            | -           |
| 83                                             | Benzene, 2-ethenyl-1,4-dimethyl-                             | C <sub>10</sub> H <sub>12</sub> | 0.16         | -            | -            | -           |
| 84                                             | Cycloprop[a]indene, 1,1a,6,6a-tetrahydro-                    | C <sub>10</sub> H <sub>10</sub> | 1.96         | 1.78         | -            | -           |
| 85                                             | 1H-Indene, 2,3-dimethyl-                                     | C <sub>11</sub> H <sub>12</sub> | 0.20         | -            | -            | -           |
| 86                                             | (1-Methylpenta-1,3-dienyl)benzene                            | C <sub>12</sub> H <sub>14</sub> | 0.13         | -            | -            | -           |
| 87                                             | Biphenyl                                                     | C <sub>12</sub> H <sub>10</sub> | 0.19         | 1.82         | 7.25         | 3.48        |
| 88                                             | Benzene, 1-ethenyl-3-methyl-                                 | C <sub>9</sub> H <sub>10</sub>  | -            | 3.17         | -            | -           |
| 89                                             | Benzene, 2-propenyl-                                         | C <sub>9</sub> H <sub>10</sub>  | -            | 0.92         | -            | -           |
| 90                                             | Benzene, (2-methyl-1-propenyl)-                              | C <sub>10</sub> H <sub>12</sub> | -            | 0.12         | -            | -           |
| 91                                             | Benzene, 4-ethenyl-1,2-dimethyl-                             | C <sub>10</sub> H <sub>12</sub> | -            | 0.13         | -            | -           |
| 92                                             | Benzene, (1-methyl-2-cyclopropen-1-yl)-                      | C <sub>10</sub> H <sub>10</sub> | -            | 0.10         | 0.43         | -           |
| 93                                             | 2-Methylindene                                               | C <sub>10</sub> H <sub>10</sub> | -            | 0.88         | -            | -           |
| 94                                             | 1H-Indene, 1-ethylidene-                                     | C <sub>11</sub> H <sub>10</sub> | -            | 0.17         | -            | 1.03        |
| 95                                             | 1,1'-Biphenyl, 4-methyl-                                     | C <sub>13</sub> H <sub>12</sub> | -            | 0.30         | -            | -           |
| 96                                             | 1,1'-Biphenyl, 2-methyl-                                     | C <sub>13</sub> H <sub>12</sub> | -            | 0.44         | -            | -           |
| 97                                             | 1,1'-Biphenyl, 3-methyl-                                     | C <sub>13</sub> H <sub>12</sub> | -            | 0.07         | -            | -           |

|                                                |                                                                                     |                                 |             |              |              |              |
|------------------------------------------------|-------------------------------------------------------------------------------------|---------------------------------|-------------|--------------|--------------|--------------|
| 98                                             | 1H-Indene, 2-phenyl-                                                                | C <sub>15</sub> H <sub>12</sub> | -           | 0.09         | -            | -            |
| 99                                             | Benzene, 1-methyl-4-(1-propynyl)-                                                   | C <sub>10</sub> H <sub>10</sub> | -           | -            | 0.45         | -            |
| <b>Polycyclic aromatic hydrocarbons (PAHs)</b> |                                                                                     |                                 | <b>7.37</b> | <b>38.65</b> | <b>66.02</b> | <b>92.01</b> |
| 100                                            | Naphthalene                                                                         | C <sub>10</sub> H <sub>8</sub>  | 2.60        | 11.71        | 26.38        | 47.11        |
| 101                                            | Naphthalene, 1,2-dihydro-3-methyl-                                                  | C <sub>11</sub> H <sub>12</sub> | 0.62        | -            | -            | -            |
| 102                                            | Naphthalene, 2-methyl-                                                              | C <sub>11</sub> H <sub>10</sub> | 1.48        | 6.23         | 6.40         | -            |
| 103                                            | Tricyclo[6.4.0.0(3,7)]dodeca-1,9,11-triene                                          | C <sub>12</sub> H <sub>14</sub> | 0.11        | -            | -            | -            |
| 104                                            | Naphthalene, 1-methyl-                                                              | C <sub>11</sub> H <sub>10</sub> | -           | 0.10         | -            | -            |
| 105                                            | Naphthalene, 2-ethyl-                                                               | C <sub>12</sub> H <sub>12</sub> | 0.12        | 0.09         | -            | -            |
| 106                                            | Naphthalene, 1-ethyl-                                                               | C <sub>12</sub> H <sub>12</sub> | 0.17        | -            | -            | -            |
| 107                                            | Naphthalene, 2,6-dimethyl-                                                          | C <sub>12</sub> H <sub>12</sub> | 0.12        | 0.12         | -            | -            |
| 108                                            | Naphthalene, 1,7-dimethyl-                                                          | C <sub>12</sub> H <sub>12</sub> | 0.14        | -            | -            | -            |
| 109                                            | Acenaphthene                                                                        | C <sub>12</sub> H <sub>10</sub> | 0.13        | 0.43         | 1.06         | 0.79         |
| 110                                            | Naphthalene, 2-ethenyl-                                                             | C <sub>12</sub> H <sub>10</sub> | 0.15        | 0.57         | 4.78         | -            |
| 111                                            | Naphthalene, 1,8-dimethyl-                                                          | C <sub>12</sub> H <sub>12</sub> | 0.12        | -            | -            | -            |
| 112                                            | Acenaphthylene                                                                      | C <sub>12</sub> H <sub>8</sub>  | 0.39        | 2.75         | -            | 10.11        |
| 113                                            | Fluorene                                                                            | C <sub>13</sub> H <sub>10</sub> | 0.50        | 1.64         | 5.52         | 1.04         |
| 114                                            | Phenanthrene                                                                        | C <sub>14</sub> H <sub>10</sub> | 0.25        | 2.03         | 4.82         | 11.98        |
| 115                                            | Anthracene                                                                          | C <sub>14</sub> H <sub>10</sub> | 0.09        | 6.07         | 0.28         | -            |
| 116                                            | 8,9-Dihydrocyclopenta[def]phenanthrene                                              | C <sub>15</sub> H <sub>12</sub> | 0.10        | -            | -            | -            |
| 117                                            | Benzo[k]fluoranthene                                                                | C <sub>20</sub> H <sub>12</sub> | 0.12        | -            | -            | 1.24         |
| 118                                            | Fluoranthene                                                                        | C <sub>16</sub> H <sub>10</sub> | 0.17        | 2.27         | 11.61        | 17.40        |
| 119                                            | Naphthalene, 1,2-dihydro-2-methyl-                                                  | C <sub>11</sub> H <sub>12</sub> | -           | 0.06         | -            | -            |
| 120                                            | Naphthalene, 1,2-dihydro-4-methyl-                                                  | C <sub>11</sub> H <sub>12</sub> | -           | 0.12         | -            | -            |
| 121                                            | Naphthalene, 1,6-dimethyl-                                                          | C <sub>12</sub> H <sub>12</sub> | -           | 0.17         | -            | -            |
| 122                                            | Naphthalene, 1,3-dimethyl-                                                          | C <sub>12</sub> H <sub>12</sub> | -           | 0.29         | -            | -            |
| 123                                            | 1-Isopropenyl-naphthalene                                                           | C <sub>13</sub> H <sub>12</sub> | -           | 0.09         | -            | -            |
| 124                                            | Naphthalene, 1-(2-propenyl)-                                                        | C <sub>13</sub> H <sub>12</sub> | -           | 0.28         | -            | -            |
| 125                                            | 9H-Fluorene, 9-methyl-                                                              | C <sub>14</sub> H <sub>12</sub> | -           | 0.45         | -            | -            |
| 126                                            | 9H-Fluorene, 1-methyl-                                                              | C <sub>14</sub> H <sub>12</sub> | -           | 0.32         | 0.66         | -            |
| 128                                            | Anthracene, 9,10-dihydro-                                                           | C <sub>14</sub> H <sub>12</sub> | -           | 0.06         | -            | -            |
| 129                                            | 1H-Indene, 2-phenyl-                                                                | C <sub>15</sub> H <sub>12</sub> | -           | 0.09         | -            | -            |
| 130                                            | Anthracene, 2-methyl-                                                               | C <sub>15</sub> H <sub>12</sub> | -           | 0.20         | -            | -            |
| 131                                            | Phenanthrene, 2-methyl-                                                             | C <sub>15</sub> H <sub>12</sub> | -           | 0.91         | -            | -            |
| 132                                            | 4H-Cyclopenta[def]phenanthrene                                                      | C <sub>15</sub> H <sub>10</sub> | -           | 0.32         | 1.25         | 0.53         |
| 133                                            | Naphthalene, 2-phenyl-                                                              | C <sub>16</sub> H <sub>12</sub> | -           | 0.38         | 1.66         | 1.23         |
| 134                                            | Tricyclo[8.2.2.2(4,7)]hexadeca-2,4,6,8,10,12,13,15-octaene                          | C <sub>16</sub> H <sub>12</sub> | -           | 0.06         | -            | -            |
| 135                                            | Naphthalene, 1,8-di-1-propynyl-                                                     | C <sub>16</sub> H <sub>12</sub> | -           | 0.15         | -            | -            |
| 136                                            | 5,16[1',2']:8,13[1'',2'']-Dibenzenodibenzo[a,g]cyclododecene, 6,7,14,15-tetrahydro- | C <sub>32</sub> H <sub>24</sub> | -           | 0.08         | -            | -            |
| 137                                            | Pyrene, 4,5-dihydro-                                                                | C <sub>16</sub> H <sub>12</sub> | -           | 0.19         | -            | -            |
| 138                                            | Pyrene, 1-methyl-                                                                   | C <sub>17</sub> H <sub>12</sub> | -           | 0.13         | -            | -            |
| 139                                            | 11H-Benzo[a]fluorene                                                                | C <sub>17</sub> H <sub>12</sub> | -           | 0.31         | -            | -            |
| 140                                            | Naphthalene, 1-phenyl-                                                              | C <sub>16</sub> H <sub>12</sub> | -           | -            | 1.26         | -            |
| 141                                            | Pyrene, 4-methyl-                                                                   | C <sub>17</sub> H <sub>12</sub> | -           | -            | 0.32         | -            |
| 142                                            | 1,4-Ethenoanthracene, 1,4-dihydro-                                                  | C <sub>16</sub> H <sub>12</sub> | -           | -            | -            | 0.58         |

**Table S2.** Compounds of WCO-biodiesel in liquid products under the influence of CS at different pyrolysis temperatures were analyzed by GC-MS.

| No.                        | Name of compound                                                                                 | Molecular formula                              | Relative concentration (peak area %) |        |        |        |
|----------------------------|--------------------------------------------------------------------------------------------------|------------------------------------------------|--------------------------------------|--------|--------|--------|
|                            |                                                                                                  |                                                | 600 °C                               | 700 °C | 800 °C | 900 °C |
| Oxygenated compounds (OCs) |                                                                                                  |                                                | 40.63                                | 7.06   | -      | -      |
| 1                          | Cyclobutanone, 2,2,3-trimethyl-                                                                  | C <sub>7</sub> H <sub>12</sub> O               | 1.48                                 | -      | -      | -      |
| 2                          | 4-Hexen-1-ol, (Z)-                                                                               | C <sub>6</sub> H <sub>12</sub> O               | 0.29                                 | -      | -      | -      |
| 3                          | 2-Propenoic acid, methyl ester                                                                   | C <sub>4</sub> H <sub>6</sub> O <sub>2</sub>   | 3.02                                 | -      | -      | -      |
| 4                          | Acetic acid, methyl ester                                                                        | C <sub>3</sub> H <sub>6</sub> O <sub>2</sub>   | 0.87                                 | -      | -      | -      |
| 5                          | 4-Nonenoic acid, methyl ester                                                                    | C <sub>10</sub> H <sub>18</sub> O <sub>2</sub> | 0.76                                 | -      | -      | -      |
| 6                          | Methyl 3-butenolate                                                                              | C <sub>5</sub> H <sub>8</sub> O <sub>2</sub>   | 2.18                                 | -      | -      | -      |
| 7                          | 3-Oxabicyclo[4.3.0]non-8-en-2-one, cis-                                                          | C <sub>8</sub> H <sub>10</sub> O <sub>2</sub>  | 0.28                                 | -      | -      | -      |
| 8                          | Methanone, dicyclopropyl-                                                                        | C <sub>7</sub> H <sub>10</sub> O               | 0.33                                 | -      | -      | -      |
| 9                          | 4-Pentenoic acid, methyl ester                                                                   | C <sub>6</sub> H <sub>10</sub> O <sub>2</sub>  | 1.31                                 | -      | -      | -      |
| 10                         | 5-Hexenoic acid, methyl ester                                                                    | C <sub>7</sub> H <sub>12</sub> O <sub>2</sub>  | 0.75                                 | -      | -      | -      |
| 11                         | 6-Heptenoic acid, methyl ester                                                                   | C <sub>8</sub> H <sub>14</sub> O <sub>2</sub>  | 2.89                                 | -      | -      | -      |
| 12                         | Cyclopentanol, 3-(carbmethoxy)methyl-                                                            | C <sub>8</sub> H <sub>14</sub> O <sub>3</sub>  | 0.46                                 | -      | -      | -      |
| 13                         | 3-Octenoic acid, methyl ester, (Z)-                                                              | C <sub>9</sub> H <sub>16</sub> O <sub>2</sub>  | 0.98                                 | -      | -      | -      |
| 14                         | 1-Methylbicyclo[2.2.1]hept-5-ene-2-carboxylic acid, 4,4-dimethyl-2-oxotetrahydrofuran-3-yl ester | C <sub>15</sub> H <sub>20</sub> O <sub>4</sub> | 0.18                                 | -      | -      | -      |
| 15                         | Methyl 5-norbornene-2-carboxylate                                                                | C <sub>9</sub> H <sub>12</sub> O <sub>2</sub>  | 1.85                                 | -      | -      | -      |
| 16                         | 8-Nonenoic acid, methyl ester                                                                    | C <sub>10</sub> H <sub>18</sub> O <sub>2</sub> | 1.25                                 | -      | -      | -      |
| 17                         | 1,7-Dimethyl-4-oxa-tricyclo[5.2.1.0(2,6)]decane-3,5,8-trione                                     | C <sub>11</sub> H <sub>12</sub> O <sub>4</sub> | 0.28                                 | -      | -      | -      |
| 18                         | 6-Propenylbicyclo[3.1.0]hexan-2-one                                                              | C <sub>9</sub> H <sub>12</sub> O               | 0.23                                 | -      | -      | -      |
| 19                         | 4-Decenoic acid, methyl ester                                                                    | C <sub>11</sub> H <sub>20</sub> O <sub>2</sub> | 0.80                                 | -      | -      | -      |
| 20                         | 10-Undecenoic acid, methyl ester                                                                 | C <sub>12</sub> H <sub>22</sub> O <sub>2</sub> | 0.53                                 | -      | -      | -      |
| 21                         | Cyclopropanenonanoic acid, methyl ester                                                          | C <sub>13</sub> H <sub>24</sub> O <sub>2</sub> | 0.89                                 | -      | -      | -      |
| 22                         | Methyl tetradecanoate                                                                            | C <sub>15</sub> H <sub>30</sub> O <sub>2</sub> | 0.26                                 | -      | -      | -      |
| 23                         | Methyl myristoleate                                                                              | C <sub>15</sub> H <sub>28</sub> O <sub>2</sub> | 0.48                                 | -      | -      | -      |
| 24                         | 9-Octadecenoic acid (Z)-, methyl ester                                                           | C <sub>19</sub> H <sub>36</sub> O <sub>2</sub> | 0.13                                 | -      | -      | -      |
| 25                         | 2-Benzylcyclohexanone                                                                            | C <sub>13</sub> H <sub>16</sub> O              | 0.12                                 | -      | -      | -      |
| 26                         | 9-Hexadecenoic acid, methyl ester, (Z)-                                                          | C <sub>17</sub> H <sub>32</sub> O <sub>2</sub> | 0.19                                 | -      | -      | -      |
| 27                         | Hexadecanoic acid, methyl ester                                                                  | C <sub>17</sub> H <sub>34</sub> O <sub>2</sub> | 12.08                                | 1.75   | -      | -      |
| 28                         | 8-Phenyl octanoic acid                                                                           | C <sub>14</sub> H <sub>20</sub> O <sub>2</sub> | 0.21                                 | -      | -      | -      |
| 29                         | Methyl stearate                                                                                  | C <sub>19</sub> H <sub>38</sub> O <sub>2</sub> | 4.81                                 | -      | -      | -      |
| 30                         | 9,12-Octadecadienoic acid (Z,Z)-,                                                                | C <sub>19</sub> H <sub>34</sub> O <sub>2</sub> | 0.76                                 | 2.09   | -      | -      |
| 31                         | 2-Propenoic acid, methyl ester                                                                   | C <sub>4</sub> H <sub>6</sub> O <sub>2</sub>   | -                                    | 0.13   | -      | -      |
| 32                         | 9-Octadecenoic acid, methyl ester, (E)-                                                          | C <sub>19</sub> H <sub>36</sub> O <sub>2</sub> | -                                    | 2.98   | -      | -      |
| 33                         | 9,12,15-Octadecatrienoic acid, methyl                                                            | C <sub>19</sub> H <sub>32</sub> O <sub>2</sub> | -                                    | 0.11   | -      | -      |
| Alkenes                    |                                                                                                  |                                                | 16.25                                | 0.59   | -      | -      |
| 34                         | 1,3-Pentadiene, 3-methyl-, (E)-                                                                  | C <sub>4</sub> H <sub>8</sub>                  | 0.90                                 | -      | -      | -      |
| 35                         | 1-Heptene                                                                                        | C <sub>6</sub> H <sub>10</sub>                 | 0.47                                 | -      | -      | -      |
| 36                         | 1,3-Cyclopentadiene, 1-methyl-                                                                   | C <sub>7</sub> H <sub>14</sub>                 | 2.96                                 | -      | -      | -      |
| 37                         | Cyclohexene, 4-methyl-                                                                           | C <sub>6</sub> H <sub>8</sub>                  | 1.11                                 | -      | -      | -      |
| 38                         | 1-Octene                                                                                         | C <sub>7</sub> H <sub>12</sub>                 | 0.55                                 | -      | -      | -      |
| 39                         | 1,4-Cyclohexadiene, 1-methyl-                                                                    | C <sub>8</sub> H <sub>16</sub>                 | 1.76                                 | -      | -      | -      |
| 40                         | 1-Methylcyclohexa-2,4-diene                                                                      | C <sub>7</sub> H <sub>10</sub>                 | 0.33                                 | -      | -      | -      |
| 41                         | 1,6-Octadiene, 3,7-dimethyl-                                                                     | C <sub>7</sub> H <sub>10</sub>                 | 0.48                                 | -      | -      | -      |
| 42                         | 1-Nonene                                                                                         | C <sub>10</sub> H <sub>18</sub>                | 0.19                                 | -      | -      | -      |
| 43                         | 1,8-Nonadiene                                                                                    | C <sub>9</sub> H <sub>18</sub>                 | 1.20                                 | -      | -      | -      |
| 44                         | 1-Decene                                                                                         | C <sub>9</sub> H <sub>16</sub>                 | 0.40                                 | -      | -      | -      |
| 45                         | 1-Undecene                                                                                       | C <sub>10</sub> H <sub>20</sub>                | 0.87                                 | -      | -      | -      |
| 46                         | 1-Dodecene                                                                                       | C <sub>11</sub> H <sub>22</sub>                | 0.89                                 | -      | -      | -      |

|                                                |                                                              |                                 |              |              |              |              |
|------------------------------------------------|--------------------------------------------------------------|---------------------------------|--------------|--------------|--------------|--------------|
| 47                                             | Bicyclo[3.2.0]hept-2-ene, 2-methyl-                          | C <sub>12</sub> H <sub>24</sub> | 0.56         | -            | -            | -            |
| 48                                             | 1-Tridecene                                                  | C <sub>8</sub> H <sub>12</sub>  | 1.86         | -            | -            | -            |
| 49                                             | Bicyclo[2.2.1]hept-2-ene, 2,3-dimethyl-                      | C <sub>9</sub> H <sub>14</sub>  | 0.18         | -            | -            | -            |
| 50                                             | 1-Tetradecene                                                | C <sub>14</sub> H <sub>28</sub> | 0.58         | -            | -            | -            |
| 51                                             | Cyclohexene, 5,6-diethenyl-1-methyl-                         | C <sub>11</sub> H <sub>16</sub> | 0.40         | -            | -            | -            |
| 52                                             | Cetene                                                       | C <sub>16</sub> H <sub>32</sub> | 0.12         | -            | -            | -            |
| 53                                             | 3-Penten-1-yne, 3-methyl-                                    | C <sub>6</sub> H <sub>8</sub>   | -            | 0.24         | -            | -            |
| 54                                             | 1,3,5-Heptatriene, (E,E)-                                    | C <sub>7</sub> H <sub>10</sub>  | -            | 0.08         | -            | -            |
| 55                                             | Azulene                                                      | C <sub>10</sub> H <sub>8</sub>  | -            | 0.27         | -            | -            |
| <b>Alkanes</b>                                 |                                                              |                                 | <b>5.04</b>  | <b>0.19</b>  | -            | -            |
| 56                                             | Cyclopropane, 1-ethyl-2-methyl-, cis-                        | C <sub>6</sub> H <sub>12</sub>  | 3.85         | -            | -            | -            |
| 57                                             | Cyclopentane, methylene-                                     | C <sub>6</sub> H <sub>10</sub>  | 1.05         | -            | -            | -            |
| 58                                             | Cyclopentadecane                                             | C <sub>15</sub> H <sub>30</sub> | 0.15         | -            | -            | -            |
| 59                                             | Ethylidenecyclobutane                                        | C <sub>6</sub> H <sub>10</sub>  | -            | 0.10         | -            | -            |
| 60                                             | Cyclobuta[1,2:3,4]dicyclopentene, 1,3a,3b,6,6a,6b-hexahydro- | C <sub>10</sub> H <sub>12</sub> | -            | 0.09         | -            | -            |
| <b>Monocyclic aromatic hydrocarbons (MAHs)</b> |                                                              |                                 | <b>35.97</b> | <b>53.13</b> | <b>15.76</b> | <b>5.73</b>  |
| 61                                             | Benzene                                                      | C <sub>6</sub> H <sub>6</sub>   | 9.35         | 10.44        |              | 0.69         |
| 62                                             | Toluene                                                      | C <sub>7</sub> H <sub>8</sub>   | 10.07        | 11.70        |              |              |
| 63                                             | Ethylbenzene                                                 | C <sub>8</sub> H <sub>10</sub>  | 2.29         | 1.25         |              |              |
| 64                                             | p-Xylene                                                     | C <sub>8</sub> H <sub>10</sub>  | 2.27         | -            |              |              |
| 65                                             | o-Xylene                                                     | C <sub>8</sub> H <sub>10</sub>  | 1.46         | -            |              |              |
| 66                                             | Styrene                                                      | C <sub>8</sub> H <sub>8</sub>   | 2.23         | 8.43         | 4.65         |              |
| 67                                             | Benzene, propyl-                                             | C <sub>9</sub> H <sub>12</sub>  | 0.73         | 0.10         |              |              |
| 68                                             | Benzene, 1-ethyl-3-methyl-                                   | C <sub>9</sub> H <sub>12</sub>  | 1.45         | 0.51         |              |              |
| 69                                             | Benzene, (1-methylethyl)-                                    | C <sub>9</sub> H <sub>12</sub>  | 0.51         | -            |              |              |
| 70                                             | Methylstyrene                                                | C <sub>9</sub> H <sub>10</sub>  | 0.21         | 0.29         |              |              |
| 71                                             | Benzene, 2-propenyl-                                         | C <sub>9</sub> H <sub>10</sub>  | 1.03         | 0.96         |              |              |
| 72                                             | Benzene, butyl-                                              | C <sub>10</sub> H <sub>14</sub> | 0.46         | -            |              |              |
| 73                                             | Indane                                                       | C <sub>9</sub> H <sub>10</sub>  | 1.81         | 0.54         |              |              |
| 74                                             | Benzene, pentyl-                                             | C <sub>11</sub> H <sub>16</sub> | 0.29         | -            |              |              |
| 75                                             | Benzene, 1-methyl-4-(2-propenyl)-                            | C <sub>10</sub> H <sub>12</sub> | 0.19         | -            |              |              |
| 76                                             | 2-Methylindene                                               | C <sub>10</sub> H <sub>10</sub> | 1.37         | -            |              |              |
| 77                                             | Cycloprop[a]indene, 1,1a,6,6a-tetrahydro-                    | C <sub>10</sub> H <sub>10</sub> | 0.24         | 1.85         |              |              |
| 78                                             | Benzene, 1,3-dimethyl-                                       | C <sub>8</sub> H <sub>10</sub>  | -            | 3.70         |              |              |
| 79                                             | Benzene, 1-ethyl-4-methyl-                                   | C <sub>9</sub> H <sub>12</sub>  | -            | 0.06         |              |              |
| 80                                             | Mesitylene                                                   | C <sub>9</sub> H <sub>12</sub>  | -            | 0.17         |              |              |
| 81                                             | Benzene, 1-ethenyl-3-methyl-                                 | C <sub>9</sub> H <sub>10</sub>  | -            | 3.29         |              |              |
| 82                                             | Indene                                                       | C <sub>9</sub> H <sub>8</sub>   | -            | 4.76         | 3.88         | 0.66         |
| 83                                             | Benzene, (2-methyl-1-propenyl)-                              | C <sub>10</sub> H <sub>12</sub> | -            | 0.12         |              |              |
| 84                                             | Benzene, 4-ethenyl-1,2-dimethyl-                             | C <sub>10</sub> H <sub>12</sub> | -            | 0.14         |              |              |
| 85                                             | Benzene, (1-methyl-2-cyclopropen-1-yl)-                      | C <sub>10</sub> H <sub>10</sub> | -            | 0.10         |              |              |
| 86                                             | Benzene, 1,3-diethenyl-                                      | C <sub>10</sub> H <sub>10</sub> | -            | 0.91         |              |              |
| 87                                             | 2-Methylindene                                               | C <sub>10</sub> H <sub>10</sub> | -            | 0.06         |              |              |
| 88                                             | Naphthalene, 1,2-dihydro-2-methyl-                           | C <sub>11</sub> H <sub>12</sub> | -            | 0.12         |              |              |
| 89                                             | Naphthalene, 1,2-dihydro-4-methyl-                           | C <sub>11</sub> H <sub>12</sub> | -            | 0.25         |              |              |
| 90                                             | 1H-Indene, 1-ethylidene-                                     | C <sub>11</sub> H <sub>10</sub> | -            | 1.88         |              | 1.15         |
| 91                                             | Biphenyl                                                     | C <sub>12</sub> H <sub>10</sub> | -            | 0.31         | 7.22         | 3.24         |
| 92                                             | 1,1'-Biphenyl, 4-methyl-                                     | C <sub>13</sub> H <sub>12</sub> | -            | 0.45         | -            | -            |
| 93                                             | 1,1'-Biphenyl, 2-methyl-                                     | C <sub>13</sub> H <sub>12</sub> | -            | 0.07         | -            | -            |
| 94                                             | 1,1'-Biphenyl, 3-methyl-                                     | C <sub>13</sub> H <sub>12</sub> | -            | 0.91         | -            | -            |
| <b>Polycyclic aromatic hydrocarbons (PAHs)</b> |                                                              |                                 | <b>2.11</b>  | <b>39.02</b> | <b>84.24</b> | <b>94.27</b> |
| 95                                             | Naphthalene                                                  | C <sub>10</sub> H <sub>8</sub>  | 0.99         | 12.13        | 46.72        | 52.61        |
| 96                                             | Naphthalene, 1-methyl-                                       | C <sub>11</sub> H <sub>10</sub> | 0.41         | 0.10         | 4.09         | -            |
| 97                                             | Naphthalene, 2-methyl-                                       | C <sub>11</sub> H <sub>10</sub> | 0.42         | 6.46         | -            | 9.67         |
| 98                                             | Acenaphthylene                                               | C <sub>12</sub> H <sub>8</sub>  | 0.12         | 2.85         | 8.11         | -            |
| 99                                             | Fluorene                                                     | C <sub>13</sub> H <sub>10</sub> | 0.16         | 3.53         | 2.65         | 0.89         |



|     |                                                                                     |                                 |   |      |       |       |
|-----|-------------------------------------------------------------------------------------|---------------------------------|---|------|-------|-------|
| 100 | Naphthalene, 2-ethyl-                                                               | C <sub>12</sub> H <sub>12</sub> | - | 0.10 | -     | -     |
| 101 | Naphthalene, 1,6-dimethyl-                                                          | C <sub>12</sub> H <sub>12</sub> | - | 0.17 | -     | -     |
| 102 | Naphthalene, 1,3-dimethyl-                                                          | C <sub>12</sub> H <sub>12</sub> | - | 0.30 | -     | -     |
| 103 | Naphthalene, 2-ethenyl-                                                             | C <sub>12</sub> H <sub>10</sub> | - | 2.13 | -     | -     |
| 104 | Naphthalene, 2,6-dimethyl-                                                          | C <sub>12</sub> H <sub>12</sub> | - | 0.13 | -     | -     |
| 105 | 1-Isopropenyl naphthalene                                                           | C <sub>13</sub> H <sub>12</sub> | - | 0.10 | -     | -     |
| 106 | Acenaphthene                                                                        | C <sub>12</sub> H <sub>10</sub> | - | 0.44 | -     | 0.62  |
| 107 | Naphthalene, 1-(2-propenyl)-                                                        | C <sub>13</sub> H <sub>12</sub> | - | 0.29 | 0.97  | -     |
| 108 | 9H-Fluorene, 9-methyl-                                                              | C <sub>14</sub> H <sub>12</sub> | - | 0.44 | -     | -     |
| 109 | 9H-Fluorene, 1-methyl-                                                              | C <sub>14</sub> H <sub>12</sub> | - | 0.29 | -     | -     |
| 110 | Anthracene, 9,10-dihydro-                                                           | C <sub>14</sub> H <sub>12</sub> | - | 0.46 | -     | -     |
| 111 | 1H-Indene, 2-phenyl-                                                                | C <sub>15</sub> H <sub>12</sub> | - | 0.33 | -     | -     |
| 112 | Anthracene                                                                          | C <sub>14</sub> H <sub>10</sub> | - | 0.06 | -     | -     |
| 113 | Phenanthrene                                                                        | C <sub>14</sub> H <sub>10</sub> | - | 0.09 | 12.66 | 14.31 |
| 114 | Pyrene                                                                              | C <sub>16</sub> H <sub>10</sub> | - | -    | 4.87  | -     |
| 115 | Phenanthrene, 2-methyl-                                                             | C <sub>15</sub> H <sub>12</sub> | - | 3.14 | -     | -     |
| 116 | Anthracene, 2-methyl-                                                               | C <sub>15</sub> H <sub>12</sub> | - | 1.05 | -     | -     |
| 117 | 4H-Cyclopenta[def]phenanthrene                                                      | C <sub>15</sub> H <sub>10</sub> | - | 0.94 | 0.83  | -     |
| 118 | Naphthalene, 2-phenyl-                                                              | C <sub>16</sub> H <sub>12</sub> | - | 0.20 | -     | -     |
| 119 | Tricyclo[8.2.2.2(4,7)]hexadeca-2,4,6,8,10,12,13,15-octaene                          | C <sub>16</sub> H <sub>12</sub> | - | 0.33 | -     | -     |
| 120 | Naphthalene, 1,8-di-1-propynyl-                                                     | C <sub>16</sub> H <sub>12</sub> | - | 0.39 | -     | -     |
| 121 | 5,16[1',2']:8,13[1'',2'']-Dibenzonodibenzo[a,g]cyclododecene, 6,7,14,15-tetrahydro- | C <sub>32</sub> H <sub>24</sub> | - | 0.06 | -     | -     |
| 122 | Fluoranthene                                                                        | C <sub>16</sub> H <sub>10</sub> | - | 0.16 | 2.49  | 15.64 |
| 123 | Pyrene, 4,5-dihydro-                                                                | C <sub>16</sub> H <sub>12</sub> | - | 0.08 | -     | -     |
| 124 | Pyrene, 1-methyl-                                                                   | C <sub>17</sub> H <sub>12</sub> | - | 2.35 | -     | -     |
| 125 | 11H-Benzo[a]fluorene                                                                | C <sub>17</sub> H <sub>12</sub> | - | 0.20 | -     | -     |
| 126 | 11H-Benzo[b]fluorene                                                                | C <sub>17</sub> H <sub>12</sub> | - | 0.13 | -     | -     |
| 127 | 1,4-Ethenoanthracene, 1,4-dihydro-                                                  | C <sub>16</sub> H <sub>12</sub> | - | -    | -     | 0.53  |
